# Supplementary material for: Fast explosive performance prediction via small-dose energetic materials based on time-resolved imaging combined with machine learning
Source: Royal Society of Chemistry journal article supplement (doi:10.1039/d2ta02626k), 2022-01-01
Supplement: d2ta02626k1.pdf [file d2ta02626k1.pdf]

## Supporting Information

### **Fast explosive performance prediction via small dose energetic materials based on time-resolved image combined with machine learning**

Xianshuang Wang<sup>a</sup>, Yage He<sup>a</sup>, Wenli Cao<sup>b</sup>, Wei Guo<sup>a</sup>, Tonglai Zhang<sup>b</sup>, Jianguo Zhang<sup>b</sup>, Qinghai Shu<sup>c</sup>, Xueyong Guo<sup>b</sup>, Ruibin Liu<sup>a, \*</sup>, and Yugui Yao<sup>a,d, \*</sup>

<sup>a</sup>Key Lab of advanced optoelectronic quantum architecture and measurement (Ministry of Education), Beijing Key Lab of Nanophotonics & Ultrafine Optoelectronic Systems, and School of Physics, Beijing Institute of Technology, Beijing 100081, China.

<sup>b</sup>State Key Laboratory of Explosion Science and Technology, Beijing Institute of Technology, Beijing 100081, China.

<sup>c</sup>School of Materials Science and Engineering, Beijing Institute of Technology, Beijing 100081 China.

<sup>d</sup>Frontiers Science Center for High Energy Material (MOE), Beijing Institute of Technology, Beijing 100081, China.

\*Corresponding author:

TEL: +86-13520398457. Email: liusir@bit.edu.cn (Ruibin Liu)

TEL: 86-010-68918672. E-mail: ygyao@bit.edu.cn (Yugui Yao)

## **Contents**

**Page S3    Supplementary Figure 1**

Configuration for high-speed schlieren imaging and spectrum system.

**Page S3    Supplementary Figure 2**

Schematic diagram of image HOG feature extraction.

**Page S4    Supplementary Table 1**

EMs information and calculated detonation parameters list.

**Page S6    Supplementary Table 2**

Model assessment parameters.

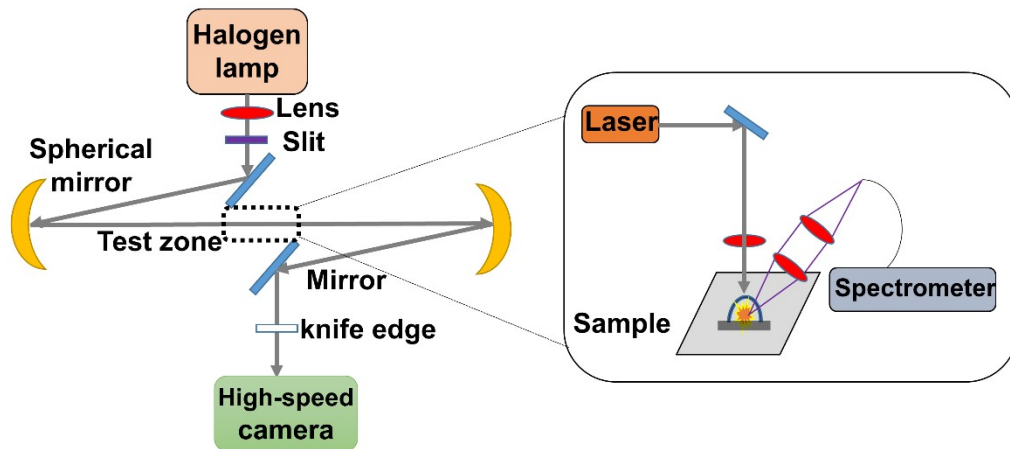

**Supplementary Figure 1.** Configuration for high-speed schlieren imaging and spectrum system.

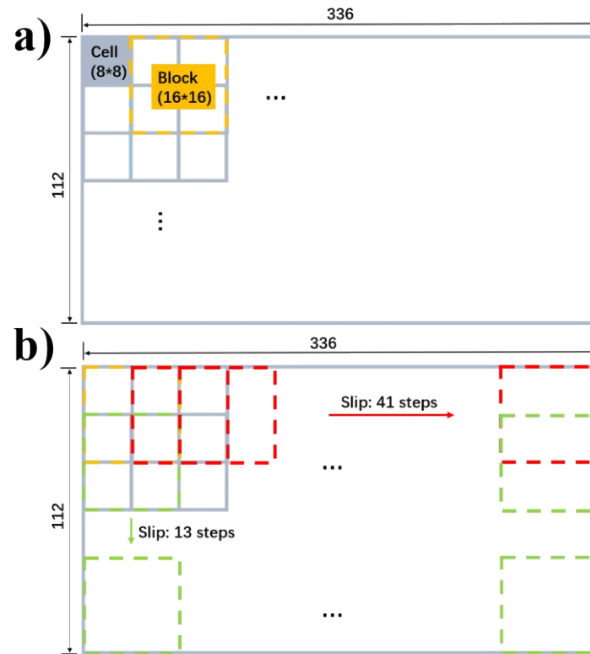

**Supplementary Figure 2.** Schematic diagram of image HOG feature extraction.

**Supplementary Table 1. EMs information and calculated detonation parameters list.**

| Abbreviation<br>/Formula                                      | Sample<br>number | Chemical name                                                                                          | Crystal<br>Density<br>$\rho(\text{g}/\text{cm}^3)$ | DV<br>(m/s) | HoD<br>(-kJ/kg) | VoD<br>( $\text{dm}^3/\text{k}$ ) | DP<br>(GPa) | DT<br>(k) |
|---------------------------------------------------------------|------------------|--------------------------------------------------------------------------------------------------------|----------------------------------------------------|-------------|-----------------|-----------------------------------|-------------|-----------|
| CL-20                                                         | D1               | Hexanitrohexaazaisowurtzitane                                                                          | 2.038 <sup>a</sup>                                 | 9604        | 6234            | 732                               | 46          | 4103      |
| HMX                                                           | D2               | Cyclotetramethylene<br>tetranitramine                                                                  | 1.905 <sup>a</sup>                                 | 9193        | 5700            | 763                               | 38          | 3646      |
| RDX                                                           | D3               | Cyclotrimethylene trinitramine                                                                         | 1.800 <sup>a</sup>                                 | 8818        | 5768            | 816                               | 35          | 3749      |
| TNT                                                           | D4               | Trinitrotoluene                                                                                        | 1.654 <sup>a</sup>                                 | 6824        | 4427            | 633                               | 19          | 3222      |
| FOX-7                                                         | D5               | 1,1-Diamino-2,2-dinitroethylene                                                                        | 1.756 <sup>a</sup>                                 | 8266        | 4588            | 791                               | 28          | 3209      |
| TATB                                                          | D6               | Triaminotrinitrobenzene                                                                                | 1.940 <sup>a</sup>                                 | 8201        | 3858            | 670                               | 28          | 2756      |
| LLM-105                                                       | D7               | 2,6-Diamino-3,5-dinitropyrazine-<br>1-oxide                                                            | 1.913 <sup>a</sup>                                 | 8498        | 4396            | 701                               | 31          | 3137      |
| DNAN                                                          | D8               | 2,4-Dinitroanisole                                                                                     | 1.556 <sup>a</sup>                                 | 6174        | 3649            | 617                               | 18          | 2835      |
| NTO                                                           | D9               | 3-nitro-1,2,4-triazol-5-one                                                                            | 1.931 <sup>a</sup>                                 | 8479        | 3755            | 720                               | 30          | 2854      |
| 1H-T                                                          | D10              | Tetrazole                                                                                              | 1.520 <sup>a</sup>                                 | 7656        | 3486            | 841                               | 20          | 2595      |
| 5-AT                                                          | D11              | Aminotetrazol                                                                                          | 1.500 <sup>a</sup>                                 | 7525        | 2582            | 890                               | 18          | 2069      |
| DAT                                                           | D12              | 1,5-diaminodiazole                                                                                     | 1.590 <sup>a</sup>                                 | 8386        | 2856            | 917                               | 23          | 2120      |
| 1-MAT                                                         | D13              | 1-methyl-5-aminotetrazole                                                                              | 1.750 <sup>a</sup>                                 | 8632        | 1637            | 846                               | 24          | 1408      |
| H2BT                                                          | D14              | Bistetrazole                                                                                           | 1.740 <sup>a</sup>                                 | 8315        | 3715            | 779                               | 25          | 2860      |
| H2BTA                                                         | D15              | N,N-bis-(1(2)H-tetrazol-5-yl)<br>amine                                                                 | 1.860 <sup>a</sup>                                 | 9076        | 3321            | 806                               | 30          | 2487      |
| H2BTM                                                         | D16              | Ditetrazolomethane                                                                                     | 1.680 <sup>a</sup>                                 | 7794        | 2890            | 769                               | 21          | 2235      |
| H2BTE                                                         | D17              | Ditetrazelethane                                                                                       | 1.490 <sup>a</sup>                                 | 6720        | 2338            | 772                               | 14          | 1877      |
| C <sub>4</sub> H <sub>7</sub> N <sub>9</sub> O <sub>3</sub>   | D18              | Ammonium N-(5-(5-amino-<br>1,2,4-oxadiazol-3-yl)-3H-1,2,4-<br>triazol-3-yl) nitramidate                | 1.769 <sup>b</sup>                                 | 8324        | 3907            | 815                               | 26          | 2767      |
| C <sub>5</sub> H <sub>10</sub> N <sub>12</sub> O <sub>3</sub> | D19              | Aminoguanidinium N-(5-(5-<br>amino-1,2,4-oxadiazol-3-yl)-3H-<br>1,2,4-triazol-3-yl)nitramidate         | 1.703 <sup>b</sup>                                 | 8136        | 3471            | 835                               | 24          | 2503      |
| C <sub>5</sub> H <sub>8</sub> N <sub>14</sub> O <sub>3</sub>  | D20              | 1,5-diamino-tetrazolium N-(5-(5-<br>amino-1,2,4-oxadiazol-3-yl)-3H-<br>1,2,4-triazol-3-yl) nitramidate | 1.763 <sup>b</sup>                                 | 8471        | 4192            | 812                               | 27          | 2977      |
| C <sub>4</sub> H <sub>9</sub> N <sub>11</sub> O <sub>5</sub>  | D21              | Diammonium N-(5-(5-<br>(nitramino)-1,2,4-oxadiazol-3-<br>yl)-3H-1,2,4-triazol-3-yl)<br>nitramidate     | 1.765 <sup>b</sup>                                 | 8433        | 4050            | 845                               | 27          | 2867      |

|                                                               |     |                                                                                                          |                    |      |      |     |    |      |
|---------------------------------------------------------------|-----|----------------------------------------------------------------------------------------------------------|--------------------|------|------|-----|----|------|
| C <sub>4</sub> H <sub>11</sub> N <sub>13</sub> O <sub>5</sub> | D22 | Dihydrazinium N-(5-(5-(nitramino)-1,2,4-oxadiazol-3-yl)-3H-1,2,4-triazol-3-yl) nitramidate               | 1.783 <sup>b</sup> | 9018 | 4798 | 878 | 32 | 3146 |
| C <sub>4</sub> H <sub>9</sub> N <sub>11</sub> O <sub>7</sub>  | D23 | Dihydroxylammonium N-(5-(5-(nitramino)-1,2,4-oxadiazol-3-yl)-3H-1,2,4-triazol-3-yl) nitramidate          | 1.866 <sup>b</sup> | 9135 | 5199 | 812 | 35 | 3414 |
| C <sub>6</sub> H <sub>19</sub> N <sub>21</sub> O <sub>5</sub> | D24 | Di(triaminoguanidinium) N-(5-(5-(nitramino)-1,2,4-oxadiazol-3-yl)-3H-1,2,4-triazol-3-yl) nitramidate     | 1.676 <sup>b</sup> | 8835 | 4471 | 905 | 28 | 2887 |
| C <sub>6</sub> H <sub>11</sub> N <sub>21</sub> O <sub>5</sub> | D25 | Di(1,5-diamino-tetrazolium) N-(5-(5-(nitramino)-1,2,4-oxadiazol-3-yl)-3H-1,2,4-triazol-3-yl) nitramidate | 1.786 <sup>b</sup> | 8822 | 4677 | 833 | 30 | 3262 |
| C <sub>4</sub> H <sub>4</sub> N <sub>8</sub> O <sub>3</sub>   | D26 | N-(5-(5-amino-1,2,4-oxadiazol-3-yl)-3H-1,2,4-triazol-3-yl) nitramide                                     | 1.878 <sup>b</sup> | 8484 | 4202 | 736 | 29 | 3055 |
| C <sub>4</sub> H <sub>3</sub> N <sub>9</sub> O <sub>5</sub>   | D27 | N-(5-(5-(nitramino)-1,2,4-oxadiazol-3-yl)-3H-1,2,4-triazol-3-yl) nitramide                               | 1.924 <sup>b</sup> | 9087 | 5317 | 727 | 36 | 3795 |

---

<sup>a</sup> Density derived from CCDC. <sup>b</sup> Density measured by BUILD-2200 densitometer.

**Supplementary Table 2. Model assessment parameters.**

| Targets                | Model Index | R <sup>2</sup> | MRETr | ARETr | RMSETr                  | MRETe | ARETe | RMSETe                   |
|------------------------|-------------|----------------|-------|-------|-------------------------|-------|-------|--------------------------|
| Detonation Velocity    | (1)         | 0.9851         | 1.45% | 1.07% | 88.32 m/s               | 3.00% | 1.68% | 159.97 m/s               |
|                        | (2)         | 0.9851         | 1.45% | 1.08% | 89.27 m/s               | 4.79% | 1.77% | 194.49 m/s               |
|                        | (3)         | 0.9866         | 1.46% | 1.04% | 86.98 m/s               | 3.09% | 1.65% | 158.21 m/s               |
|                        | (4)         | 0.9880         | 1.46% | 1.06% | 88.06 m/s               | 3.02% | 1.23% | 138.35 m/s               |
|                        | (5)         | 0.9861         | 1.45% | 1.10% | 90.23 m/s               | 3.48% | 1.41% | 150.32 m/s               |
| Heat of Detonation     | (1)         | 0.9885         | 7.66% | 3.60% | -132.96 kJ/kg           | 6.68% | 4.09% | -177.84 kJ/kg            |
|                        | (2)         | 0.9907         | 7.67% | 3.24% | -125.50 kJ/kg           | 6.62% | 4.25% | -185.97 kJ/kg            |
|                        | (3)         | 0.9882         | 7.65% | 3.29% | -125.96 kJ/kg           | 6.85% | 4.79% | -200.30 kJ/kg            |
|                        | (4)         | 0.9871         | 7.66% | 3.65% | -134.04 kJ/kg           | 7.01% | 4.49% | -203.36 kJ/kg            |
|                        | (5)         | 0.9899         | 7.66% | 3.48% | -129.73 kJ/kg           | 7.80% | 4.15% | -194.01 kJ/kg            |
| Volume of Detonation   | (1)         | 0.9891         | 1.43% | 1.16% | 9.06 dm <sup>3</sup> /k | 3.90% | 1.19% | 13.30 dm <sup>3</sup> /k |
|                        | (2)         | 0.9878         | 1.41% | 1.14% | 8.86 dm <sup>3</sup> /k | 3.20% | 1.47% | 14.41 dm <sup>3</sup> /k |
|                        | (3)         | 0.9814         | 1.40% | 1.13% | 8.73 dm <sup>3</sup> /k | 5.61% | 1.58% | 18.15 dm <sup>3</sup> /k |
|                        | (4)         | 0.9894         | 1.42% | 1.15% | 8.99 dm <sup>3</sup> /k | 3.58% | 1.29% | 12.83 dm <sup>3</sup> /k |
|                        | (5)         | 0.9936         | 1.39% | 1.12% | 8.66 dm <sup>3</sup> /k | 1.73% | 0.78% | 8.40 dm <sup>3</sup> /k  |
| Detonation Pressure    | (1)         | 0.9898         | 6.82% | 3.63% | 0.92 GPa                | 6.75% | 2.63% | 0.87 GPa                 |
|                        | (2)         | 0.9920         | 6.81% | 3.63% | 0.93 GPa                | 5.53% | 2.18% | 0.78 GPa                 |
|                        | (3)         | 0.9919         | 6.30% | 3.56% | 0.91 GPa                | 4.73% | 1.68% | 0.66 GPa                 |
|                        | (4)         | 0.9917         | 6.67% | 3.26% | 0.85 GPa                | 4.36% | 2.72% | 0.87 GPa                 |
|                        | (5)         | 0.9911         | 6.45% | 3.55% | 0.91 GPa                | 5.37% | 2.41% | 0.82 GPa                 |
| Detonation Temperature | (1)         | 0.9846         | 5.14% | 2.71% | 72.43 K                 | 7.70% | 4.17% | 142.26 K                 |
|                        | (2)         | 0.9912         | 4.56% | 2.64% | 71.01 K                 | 4.65% | 2.74% | 90.62 K                  |
|                        | (3)         | 0.9865         | 5.02% | 2.68% | 71.81 K                 | 5.81% | 3.60% | 123.85 K                 |
|                        | (4)         | 0.9884         | 4.96% | 2.70% | 72.43 K                 | 6.08% | 3.47% | 109.29 K                 |
|                        | (5)         | 0.9847         | 4.77% | 2.63% | 70.93 K                 | 7.20% | 4.00% | 136.07 K                 |
